# Supplementary material for: Electron-doping induced half-metallicity in one-dimensional Co-dithiolene molecular wires
Source: Royal Society of Chemistry journal article supplement (doi:10.1039/c6tc03297d), 2016-01-01
Supplement: c6tc03297d1.pdf [file c6tc03297d1.pdf]

Supplementary information

## Electron-doping induced half-metallicity in one-dimensional Co-dithiolene molecular wires

Tingting Zhang<sup>1,2</sup>, Liyan Zhu<sup>1,2\*</sup>, and Guibin Chen<sup>1,2\*</sup>

<sup>1</sup> School of Physics and Electronic & Electrical Engineering, Huaiyin Normal University, Huai'an, Jiangsu, 223300, P. R. China

<sup>2</sup> Jiangsu Key Laboratory of Modern Measurement Technology and Intelligent Systems, Huaiyin Normal University, Huai'an, Jiangsu, 223300, P. R. China

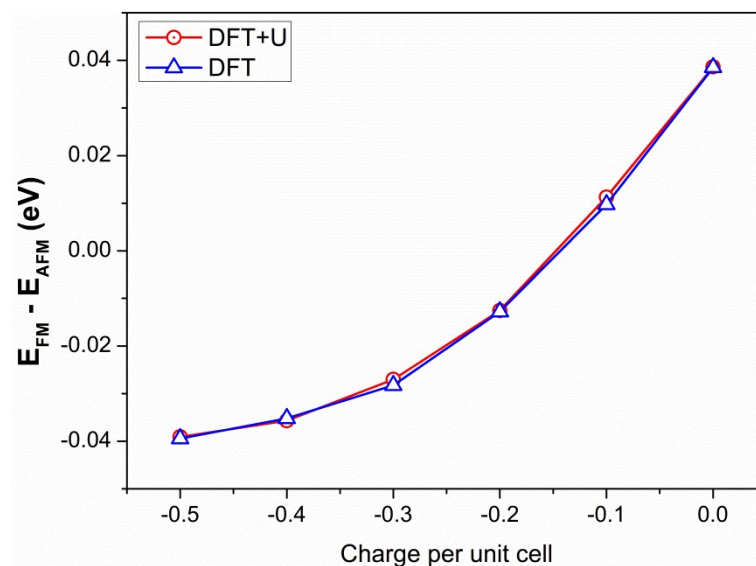

Figure S1. Comparison of the energy difference between FM and AFM ( $E_{FM}-E_{AFM}$ ) *versus* the number of electrons doped into the wire as obtained from DFT+U and DFT calculations, respectively.

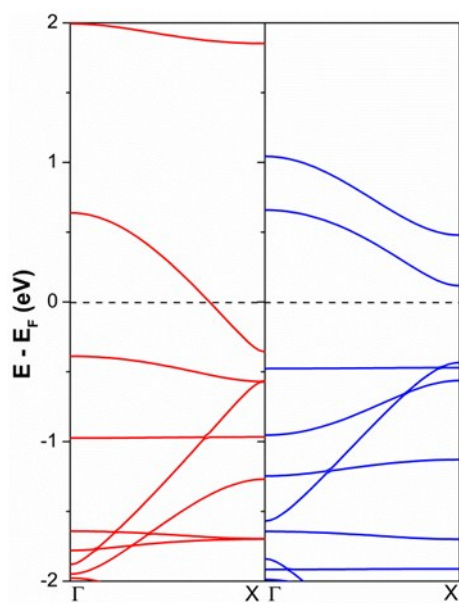

Figure S2. Band structure of electron-doped Co-dithiolene molecular wire with a concentration of 0.3e per unit cell obtained from DFT+U calculations.
